# Supplementary material for: Solid-, Solution-, and Gas-state NMR Monitoring of 13C-Cellulose Degradation in an Anaerobic Microbial Ecosystem
Source: MDPI journal article supplement (doi:10.3390/molecules18089021), 2013-07-29
Supplement: s1 [file s1]

## Supplementary Materials

**Figure S1.** Solution-state  $^1\text{H}$ -NMR spectral analysis of BC degradation products generated in an anaerobic digestion ecosystem. Sampling time is represented by colored lines as indicated in the figure.

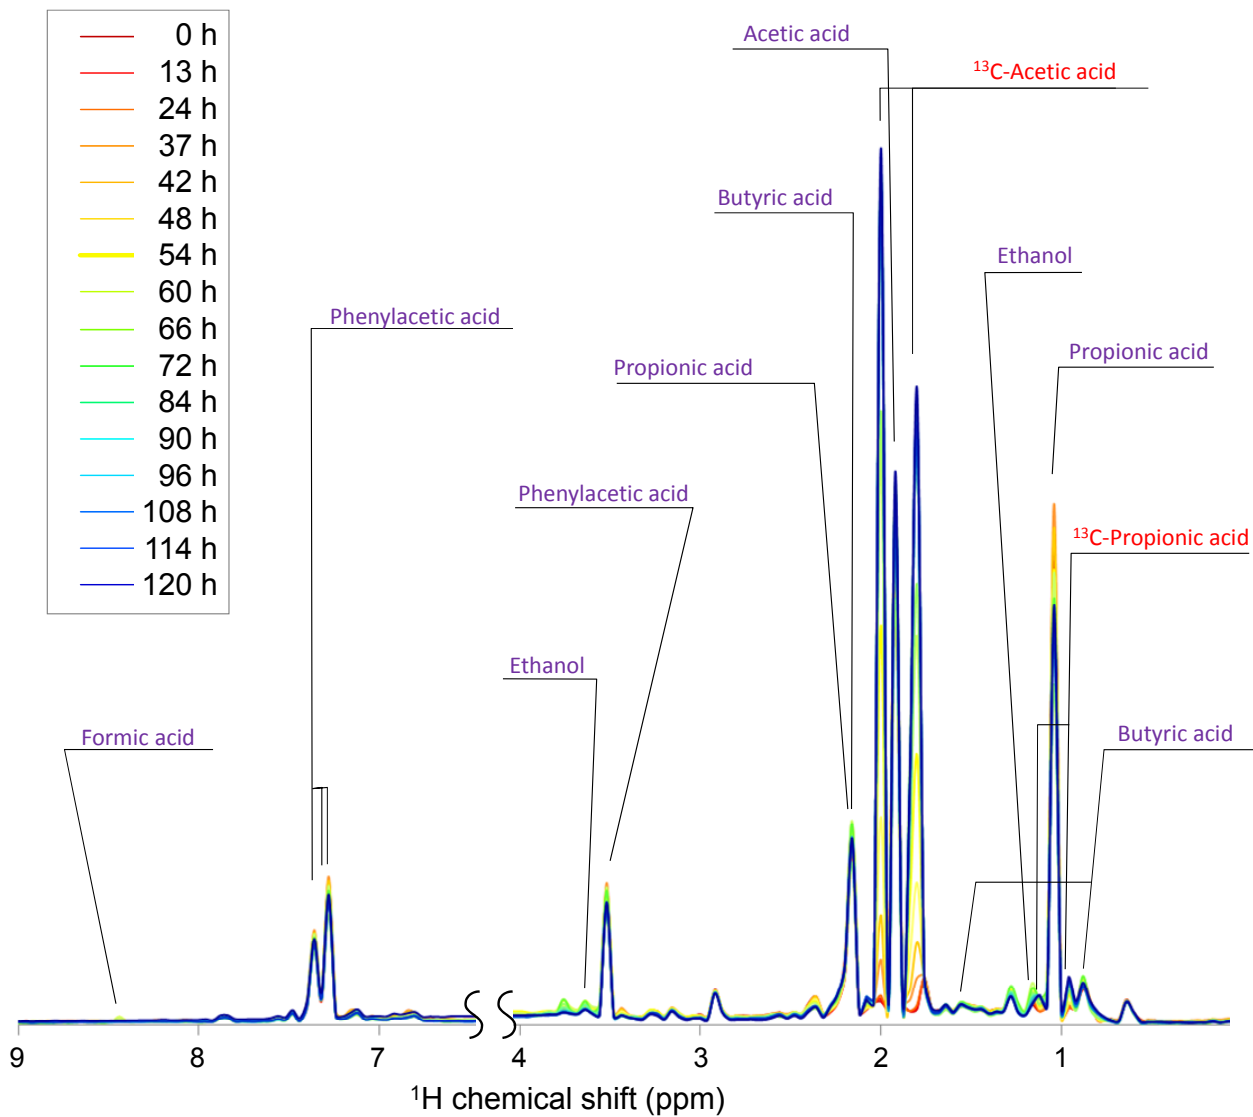

**Figure S2.** Solution-state  $^{13}\text{C}$ -NMR spectral analysis of BC degradation products generated in an anaerobic digestion ecosystem. Sampling time is represented by colored lines as indicated in the figure.

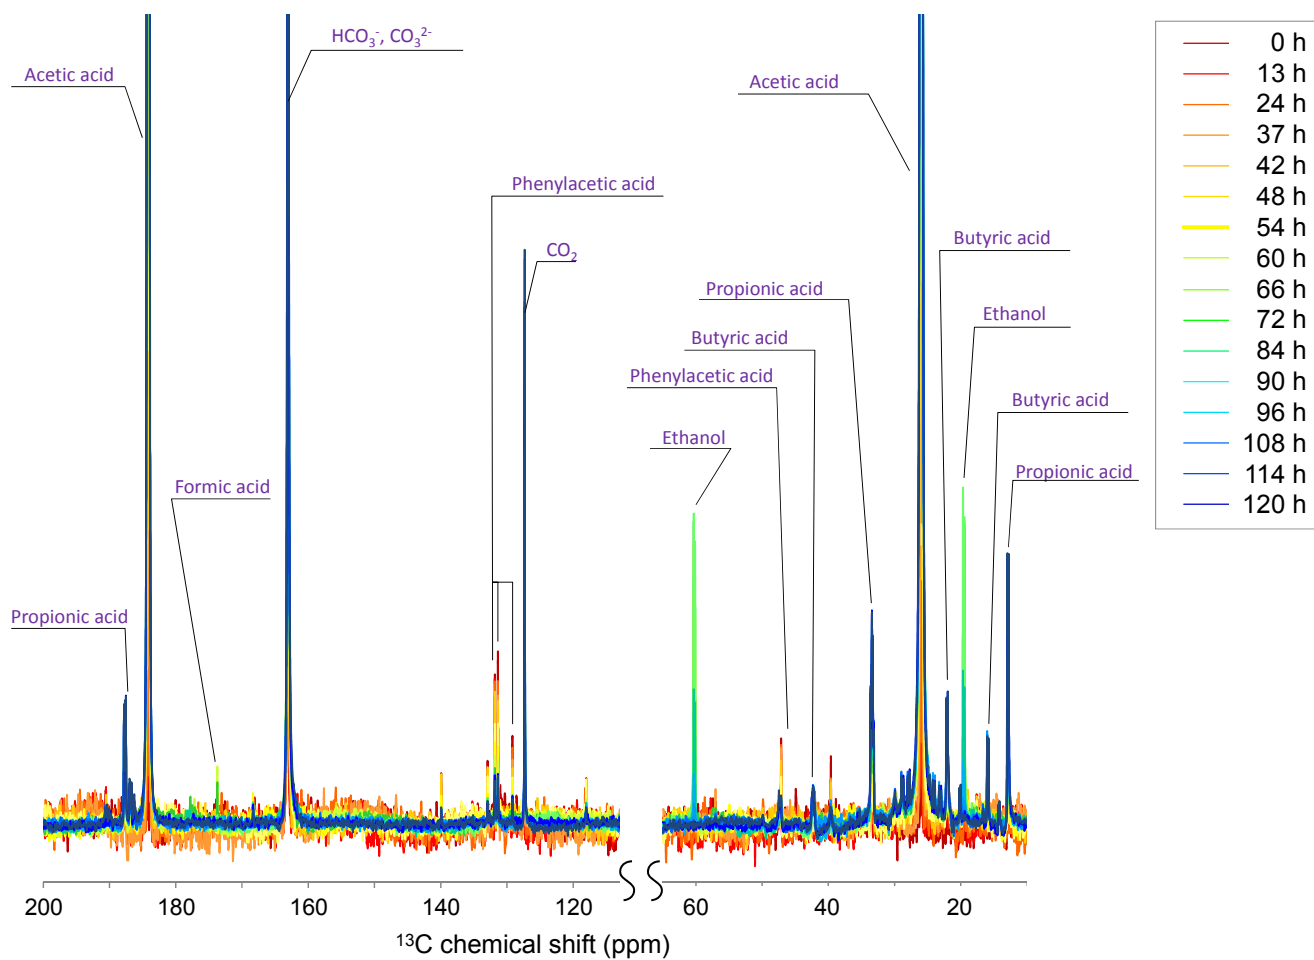

**Figure S3.** PCA score plot (A) and loading plot (B) of solution-state  $^{13}\text{C}$ -NMR spectra. Sampling time is represented by colored lines as indicated in the figure.

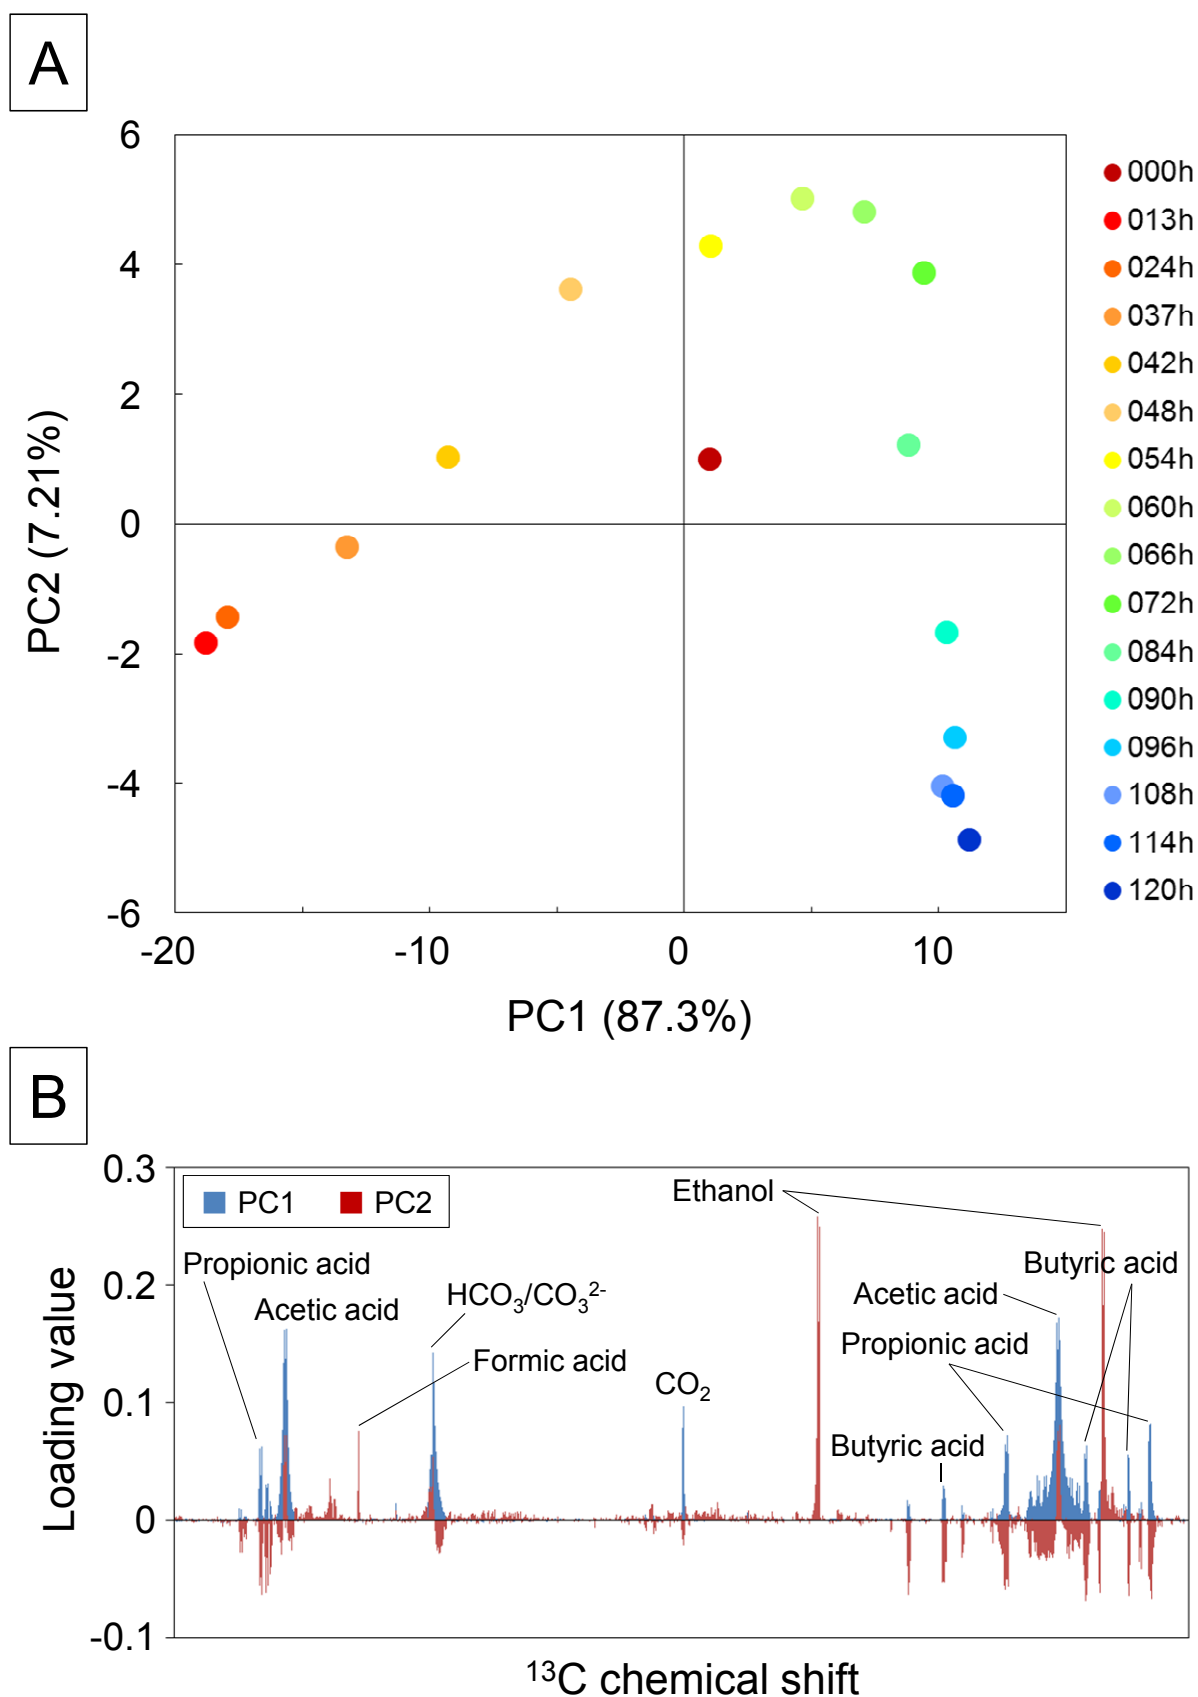

**Figure S4.** Time course variations of  $^{13}\text{C}\text{-HCO}_3^-/\text{CO}_3^{2-}$  and  $\text{CO}_2$  intensities observed in solution-state  $^{13}\text{C}$ -NMR spectra of BC degradation profiles.

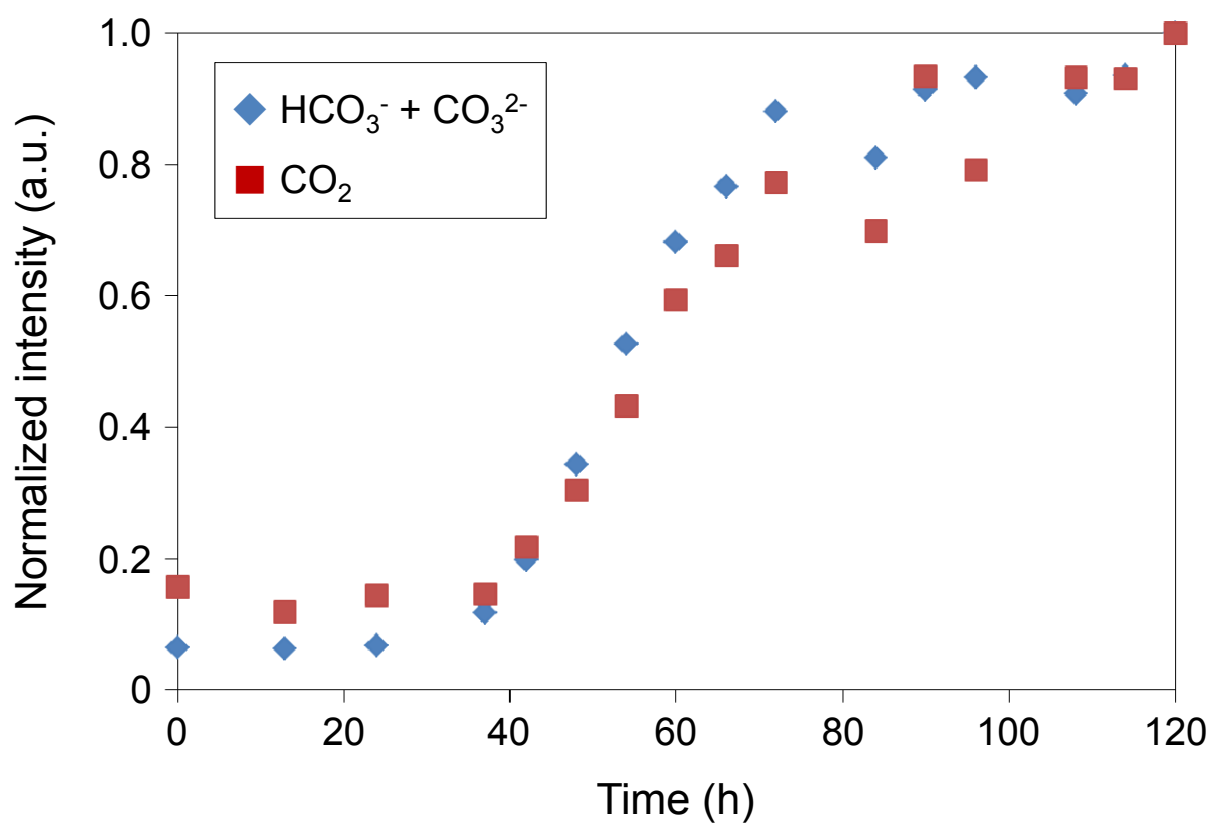

**Table S1** Annotated peaks of molecules detected in solid-, solution-, and gas-state NMR spectroscopy.

| Substances                                                    | <sup>1</sup> H chemical shift ppm<br>(multiplicity) | <sup>13</sup> C chemical shift<br>ppm (half width(Hz) for CP-MAS) |               |
|---------------------------------------------------------------|-----------------------------------------------------|-------------------------------------------------------------------|---------------|
| <b>Cellulose (solid)</b>                                      |                                                     |                                                                   |               |
| C1                                                            |                                                     | 105.18                                                            |               |
| C2, 3, 5                                                      |                                                     | 74.68, 71.93                                                      |               |
| C4                                                            |                                                     | 89.11                                                             |               |
| C4'                                                           |                                                     | 84.28                                                             |               |
| C6                                                            |                                                     | 65.38                                                             |               |
| C6'                                                           |                                                     | 62.55                                                             |               |
| <b>Crystalline I<math>\alpha</math></b>                       |                                                     |                                                                   |               |
| C1                                                            |                                                     | 105.01 (179.8)                                                    |               |
| C4                                                            |                                                     | 89.72 (180.0)                                                     |               |
|                                                               |                                                     | 88.94 (166.9)                                                     |               |
| C6                                                            |                                                     | 65.26 (204.0)                                                     |               |
| <b>Crystalline I<math>\beta</math></b>                        |                                                     |                                                                   |               |
| C1                                                            |                                                     | 105.57 (297.2)                                                    |               |
|                                                               |                                                     | 104.20 (235.0)                                                    |               |
| C4                                                            |                                                     | 88.39 (242.1)                                                     |               |
|                                                               |                                                     | 88.94 (166.9)                                                     |               |
| C6                                                            |                                                     | 66.03 (144.6)                                                     |               |
|                                                               |                                                     | 64.62 (245.1)                                                     |               |
| <b>para-Crystalline C4</b>                                    |                                                     |                                                                   |               |
| Accessible fibril surface1                                    | C4                                                  | 88.96 (573.7)                                                     |               |
| Accessible fibril surface2                                    | C4                                                  | 84.53 (131.2)                                                     |               |
| Inaccessible fibril surface                                   | C4                                                  | 83.21 (297.2)                                                     |               |
|                                                               | C4                                                  | 83.83 (940.4)                                                     |               |
| <b>Proteins (solid)</b>                                       |                                                     |                                                                   |               |
| sc                                                            |                                                     | 9.84-45.53                                                        |               |
| bb                                                            |                                                     | 46.84-59.10                                                       |               |
| C=O                                                           |                                                     | 166.89-183.01                                                     |               |
| <b>Lipids (solid)</b>                                         |                                                     |                                                                   |               |
| (CH <sub>2</sub> ) <sub>n</sub>                               |                                                     | 30.39                                                             |               |
| <b>Small molecules (liquid)</b>                               |                                                     |                                                                   |               |
| Butyric acid                                                  | 0.874                                               | (t)                                                               | 15.95         |
|                                                               | 1.541                                               | (m)                                                               | 22.08         |
|                                                               | 2.137                                               | (t)                                                               | 42.26         |
|                                                               | -                                                   |                                                                   | 186.48        |
| Propionic acid                                                | 1.045                                               | (t)                                                               | 12.91         |
|                                                               | 2.172                                               | (q)                                                               | 33.41         |
|                                                               | -                                                   |                                                                   | 187.69        |
| Ethanol                                                       | 1.172                                               | (t)                                                               | 19.57         |
|                                                               | 3.649                                               | (q)                                                               | 60.23         |
| Acetic acid                                                   | 1.909                                               | (s)                                                               | 26.0          |
|                                                               | -                                                   |                                                                   | 184.18        |
| Phenylacetic acid                                             | 3.528                                               | (s)                                                               | 47.12         |
|                                                               | 7.294                                               | (t)                                                               | 129.17        |
|                                                               | -                                                   |                                                                   | 131.85        |
|                                                               | 7.373                                               | (t)                                                               | 131.37        |
|                                                               | -                                                   |                                                                   | 139.93        |
|                                                               | -                                                   |                                                                   | 183.80        |
| Formic acid                                                   | 8.443                                               | (s)                                                               | 173.74        |
| HCO <sub>3</sub> <sup>-</sup> , CO <sub>3</sub> <sup>2-</sup> | -                                                   |                                                                   | 163.13-163.07 |
| CO <sub>2</sub>                                               | -                                                   |                                                                   | 127.34        |
| <b>Small molecules (gas)</b>                                  |                                                     |                                                                   |               |
| CO <sub>2</sub>                                               | -                                                   |                                                                   | 130.47        |
| CH <sub>4</sub>                                               | 3.203                                               |                                                                   | -5.53         |
